# Supplementary material
Source: PubMed Central journal article supplement (PMC3114442)
Supplement: NIHMS297965-supplement-01.pdf [file NIHMS297965-supplement-01.pdf]

---

# APPENDIX

## Standardized Intake Form

### Demographic Information

*As required by law, our office adheres to written policies and procedures to protect the privacy of information about you that we create, receive or maintain. Your answers are for our records only and will be kept confidential subject to applicable laws. Please note that you will be asked some questions about your responses to this questionnaire and there may be additional questions concerning your health. This information is vital to allow us to provide appropriate care for you. Our school does not use this information to discriminate.*

DATE (MONTH/DAY/YEAR): \_\_\_/\_\_\_/\_\_\_      DATE OF BIRTH: \_\_\_/\_\_\_/\_\_\_      SEX: M / F / TRANSGENDER      SSN: \_\_\_-\_\_\_-\_\_\_

Mr / Mrs / Miss / Ms / Dr / Fr / Rev      Sr / Jr / I / II / III  
\_\_\_\_\_  
PREFIX      LAST      FIRST      SUFFIX

\_\_\_\_\_  
ADDRESS      CITY      STATE      ZIP

\_\_\_\_\_  
MAILING ADDRESS (IF DIFFERENT FROM ABOVE)      CITY      STATE      ZIP

( ) -      ( ) -      ( ) -      @  
HOME PHONE      CELL PHONE      WORK PHONE      E-MAIL ADDRESS

Emergency Contact: \_\_\_\_\_ Relationship: \_\_\_\_\_ Home phone: ( ) - \_\_\_\_\_ Cell phone: ( ) - \_\_\_\_\_

If the Child is a Minor:

\_\_\_\_\_  
LAST NAME OF PARENT OR GUARDIAN      FIRST NAME OF PARENT OR GUARDIAN

\_\_\_\_\_  
MAILING ADDRESS (IF DIFFERENT FROM ABOVE)      CITY      STATE      ZIP

( ) -      ( ) -      ( ) -      @  
HOME PHONE      CELL PHONE      WORK PHONE      E-MAIL ADDRESS

Occupation: \_\_\_\_\_ Employer: \_\_\_\_\_

Do you have dental insurance? YES NO If yes, who is your provider?

\_\_\_\_\_  
PRIMARY CARRIER      POLICY HOLDER      EMPLOYER POLICY/GROUP NUMBER      SUBSCRIBER I.D.

\_\_\_\_\_  
SECONDARY CARRIER      POLICY HOLDER      EMPLOYER POLICY/GROUP NUMBER      SUBSCRIBER I.D.

\_\_\_\_\_  
TERTIARY CARRIER      POLICY HOLDER      EMPLOYER POLICY/GROUP NUMBER      SUBSCRIBER I.D.

Do you have medical insurance? YES NO If yes, who is your provider?

\_\_\_\_\_  
PRIMARY CARRIER      POLICY HOLDER      EMPLOYER POLICY/GROUP NUMBER      SUBSCRIBER I.D.

\_\_\_\_\_  
SECONDARY CARRIER      POLICY HOLDER      EMPLOYER POLICY/GROUP NUMBER      SUBSCRIBER I.D.

\_\_\_\_\_  
TERTIARY CARRIER      POLICY HOLDER      EMPLOYER POLICY/GROUP NUMBER      SUBSCRIBER I.D.



APPENDIX (continued)

**Medical History**

Name: \_\_\_\_\_ Height \_\_\_\_\_ Weight \_\_\_\_\_  
 Last First MI

Blood Pressure: \_\_\_\_/\_\_\_\_ Date: \_\_\_\_\_ Pulse: \_\_\_\_ Date: \_\_\_\_\_ (Staff will measure both)

PLEASE CIRCLE YOUR RESPONSES (YES, NO, DK (DON'T KNOW)) TO INDICATE IF YOU HAVE, HAVE NOT, OR DO NOT KNOW IF YOU HAVE HAD ANY OF THE FOLLOWING DISEASES OR PROBLEMS.

Do you have any of the following diseases or problems?

- YES NO DK Active Tuberculosis
- YES NO DK Persistent cough greater than 3 weeks in duration
- YES NO DK Cough that produces blood
- YES NO DK Been exposed to anyone with Tuberculosis

If you answered yes to any of the 4 items above, please stop. Talk to your student dentist or someone at the reception desk.

What is your impression of your health? EXCELLENT GOOD FAIR POOR Date of last physical examination (Month/Year): \_\_\_\_/\_\_\_\_

YES NO DK Are you now, or have you been in the past year, under the care of a physician? If yes, what is/are the condition(s) being treated? \_\_\_\_\_

YES NO DK Have you had any serious illness, operation, or been hospitalized in the past 5 years? If yes, what was the illness or problem? \_\_\_\_\_

YES NO DK Have you had an organ transplant? If yes, please specify: HEART KIDNEY LIVER LUNG OTHER (Specify): \_\_\_\_\_

YES NO DK Have you had open heart surgery? If yes, please specify: VALVE BYPASS (CABG) OTHER (Specify): \_\_\_\_\_  
 If yes, when was your heart surgery (Year)? \_\_\_\_\_

YES NO DK If yes, have you had any complications within the last 2 years? YES NO DK If yes, please specify: \_\_\_\_\_

YES NO DK Have you had an orthopedic total joint (e.g., hip, knee, elbow, finger) replacement?

If yes, what joint was replaced? ANKLE ELBOW FINGER HIP KNEE SHOULDER OTHER (Specify): \_\_\_\_\_

If yes, when was the joint replaced (Month/Year)? \_\_\_\_\_

If yes, have you had any complications within the last 2 years? YES NO DK If yes, please specify: \_\_\_\_\_

YES NO DK Have you ever had any radiation therapy or chemotherapy for a growth, tumor, or other condition?

Radiation: Explain: \_\_\_\_\_

Chemotherapy: Explain: \_\_\_\_\_

YES NO DK In the last 2 years, have you taken or are you now taking steroids (e.g. cortisone)? Please specify: \_\_\_\_\_

| Medication | Dosage/Frequency | Length of Period Taken<br>(Days, Weeks, Months, Years) | If no longer taking, when was the medication discontinued? |
|------------|------------------|--------------------------------------------------------|------------------------------------------------------------|
|            |                  |                                                        |                                                            |
|            |                  |                                                        |                                                            |
|            |                  |                                                        |                                                            |
|            |                  |                                                        |                                                            |

Have you taken, are you taking, or are you scheduled to begin taking?

YES NO DK Oral bisphosphonates (Alendronate (Fosamax, Fosamax Plus D), Etidronate (Didronel), Ibandronate (Boniva), Risedronate (Actonel), Tiludronate (Skelid))?

If yes, what drug, dose, and frequency?

- Fosamax: Dose: \_\_\_\_\_ Frequency: \_\_\_\_\_
- Fosamax Plus D: Dose: \_\_\_\_\_ Frequency: \_\_\_\_\_
- Didronel: Dose: \_\_\_\_\_ Frequency: \_\_\_\_\_
- Boniva: Dose: \_\_\_\_\_ Frequency: \_\_\_\_\_
- Actonel: Dose: \_\_\_\_\_ Frequency: \_\_\_\_\_
- Skelid: Dose: \_\_\_\_\_ Frequency: \_\_\_\_\_

If yes, what for?

- Osteoporosis
- Paget's disease
- Other (Specify): \_\_\_\_\_

If yes, when?

- Past (Specify MONTH/YEAR started and how long taken): \_\_\_\_\_
- Current (Specify MONTH/YEAR started): \_\_\_\_\_
- Scheduled (Specify MONTH/YEAR treatment will begin): \_\_\_\_\_

**Have you taken, are you taking, or are you scheduled to begin taking?**

**YES NO DK** Intravenous bisphosphonates (Clodronate (Bonefos), Pamidronate (Aredia), or Zoledronic Acid (Reclast, Zometa))?

If yes, what drug, dose and frequency?

- Bonefos: Dose: \_\_\_\_\_ Frequency: \_\_\_\_\_
- Aredia: Dose: \_\_\_\_\_ Frequency: \_\_\_\_\_
- Reclast: Dose: \_\_\_\_\_ Frequency: \_\_\_\_\_
- Zometa: Dose: \_\_\_\_\_ Frequency: \_\_\_\_\_

If yes, what for?

- Bone pain
- Osteoporosis
- Hypercalcemia
- Skeletal complications from Paget's disease
- Skeletal complications from multiple myeloma
- Skeletal complications from metastatic cancer

If yes, when?

- Past (Specify when started and how long taken): \_\_\_\_\_
- Current (Specify when started): \_\_\_\_\_
- Scheduled (Specify when treatment will begin): \_\_\_\_\_

**YES NO DK** Do you use or have you used tobacco (smoking, snuff, chew, bidis)? **NEVER PAST CURRENTLY**

If yes, please specify type: **SMOKING SNUFF CHEW BIDIS**

If yes, please specify amount per day: \_\_\_\_\_ For how many years: \_\_\_\_\_

If yes, how interested are you in stopping? **VERY SOMEWHAT NOT INTERESTED**

**YES NO DK** Do you drink alcoholic beverages?

If yes, how many drinks did you drink in the last 24 hours? \_\_\_\_\_

If yes, how many drinks do you typically drink in a week? \_\_\_\_\_

If yes, are you alcohol dependent? **YES NO DK**

If yes, how long have you been alcohol dependent (months)? \_\_\_\_\_

If yes, have you received treatment? **YES NO**

**YES NO DK** Do you use prescription or street drugs or other substances for recreational purposes?

If yes, please indicated drugs used:

**COCAINE HEROIN OXYCONTIN METHAMPHETAMINE ECSTASY MARIJUANA OTHER (Specify) \_\_\_\_\_**

If yes, how often do you use? \_\_\_\_\_

If yes, are you drug dependent? **YES NO DK**

If yes, how long have you been drug dependent (months)? \_\_\_\_\_

If yes, have you received treatment? **YES NO**

**WOMEN ONLY:**

**YES NO DK** Are you pregnant? If yes, number of weeks: \_\_\_\_\_

**YES NO** Are you trying to become pregnant?

**YES NO DK** Are you nursing?

**YES NO DK** Are you taking birth control pills, fertility drugs, or hormonal replacement?

(Specify): **BIRTH CONTROL FERTILITY DRUGS HORMONAL REPLACEMENT**

**YES NO DK** Are you taking, have you recently (within the last month) taken, or are you supposed to be taking any medications (prescription, over the counter, diet supplements, vitamins, natural, or herbal)? If yes, please specify medication(s), dosage, and frequency:

| Medication<br><i>Prescription or Over the Counter</i> | Dosage/Frequency | Supplements<br><i>Diet supplements, vitamins (natural or herbal)</i> | Dosage/Frequency |
|-------------------------------------------------------|------------------|----------------------------------------------------------------------|------------------|
| ASPIRIN    YES    NO                                  | Last Dose:       |                                                                      |                  |
|                                                       |                  |                                                                      |                  |
|                                                       |                  |                                                                      |                  |
|                                                       |                  |                                                                      |                  |
|                                                       |                  |                                                                      |                  |
|                                                       |                  |                                                                      |                  |
|                                                       |                  |                                                                      |                  |
|                                                       |                  |                                                                      |                  |

APPENDIX (continued)

**ALLERGIES: Are you allergic to or have you had a reaction to any of the following?**

For yes responses, please specify type of reaction:

- |           |                                            |                 |
|-----------|--------------------------------------------|-----------------|
| YES NO DK | Local anesthetics (Novocaine/Epinephrine)  | Reaction: _____ |
| YES NO DK | Penicillin                                 | Reaction: _____ |
| YES NO DK | Sulfa drugs                                | Reaction: _____ |
| YES NO DK | Other antibiotics (Specify): _____         | Reaction: _____ |
| YES NO DK | Codeine or other narcotics                 | Reaction: _____ |
| YES NO DK | Aspirin                                    | Reaction: _____ |
| YES NO DK | Barbiturates (sedatives or sleeping pills) | Reaction: _____ |
| YES NO DK | Hay fever/seasonal (allergic rhinitis)     | Reaction: _____ |
| YES NO DK | Animals                                    | Reaction: _____ |
| YES NO DK | Metals/Jewelry (nickel/chrome)             | Reaction: _____ |
| YES NO DK | Food (Specify): _____                      | Reaction: _____ |
| YES NO DK | Iodine                                     | Reaction: _____ |
| YES NO DK | Latex (rubber)                             | Reaction: _____ |
| YES NO DK | Other/Other Medication(s) (Specify): _____ | Reaction: _____ |

**MEDICAL CONDITIONS: Do you have or have you had any of the following diseases, problems, or symptoms?**

**YES NO DK Heart/Blood Pressure problem**

If yes, please specify:

- Rheumatic fever/Rheumatic heart disease
- Infective endocarditis
- Artificial heart valves
- Congenital heart defect
- Heart murmur
- Mitral valve prolapse
- Angina (chest pain): How often? \_\_\_\_\_
- Heart attack: Date(s) \_\_\_\_\_
- Heart failure
- Coronary heart disease
- High blood pressure
- Low blood pressure
- Arteriosclerosis
- Palpitations
- Arrhythmia (irregular heart beat)
- Shortness of breath
- Swelling of the ankles
- Pacemaker
- Implantable defibrillator
- Sleep on two or more pillows
- Other (Specify): \_\_\_\_\_

**YES NO DK Respiratory/Lung problem**

If yes, please specify:

- Asthma
- Emphysema/COPD
- Tuberculosis
- Sarcoidosis
- Pneumonia
- Sinusitis
- Bronchitis
- Persistent cough
- Sleep apnea
- Snoring
- Other (Specify): \_\_\_\_\_

**YES NO DK Diabetes/Endocrine disorder**

If yes, please specify:

- Diabetes
  - Type 1
  - Type 2
  - Gestational
- Thyroid problems
  - Hypothyroidism
  - Hyperthyroidism
- Adrenal gland disorder
- Other (Specify): \_\_\_\_\_

**YES NO DK Kidney/Prostate disorder**

If yes, please specify:

- Kidney stones
- Renal failure/insufficiency
- Dialysis
- Prostate
- Frequent urination
- Other (Specify): \_\_\_\_\_

**YES NO DK Cancer or Tumors**

If yes, please specify:

- Malignant
  - Location: \_\_\_\_\_
- Benign
  - Location: \_\_\_\_\_

**YES NO DK Neurologic/Nerve problem**

If yes, please specify:

- Stroke
- TIA (transient ischemic attack)
- Seizures/Epilepsy
- Multiple sclerosis
- Parkinson's disease
- Neuropathies
- Dementia/Alzheimer's (memory loss)
- Headache
- Fainting or dizzy spells
- Weakness
- Feeling of tingling or numbness
- Psychiatric disease/Mental health disorder
  - Bipolar/Manic depression
  - Schizophrenia
  - Depression
- Post traumatic stress disorder
- Obsessive/compulsive disorder
- ADD/ADHD (attention deficit disorder)
- Feelings of anxiety
- Feelings of depression
- Other (Specify): \_\_\_\_\_

**YES NO DK Blood/Hematologic disorder**

If yes, please specify:

- Anemia
- Thalassemia
- Sickle cell disease
- Sickle cell trait
- Deep vein thrombosis
- Bruise easily
- Leukemia
  - Acute lymphocytic
  - Chronic lymphocytic
  - Acute myelogenous
  - Chronic myelogenous
- Lymphoma
  - Hodgkin's
  - Non-Hodgkin's
- Multiple myeloma
- Bleeding disorders
  - Hemophilia
  - Von Willebrand's
  - Drug induced
  - Idiopathic thrombocytopenic purpura
  - Other (Specify): \_\_\_\_\_
- Other (Specify): \_\_\_\_\_

**YES NO DK Stomach/Intestine/Liver disorder**

If yes, please specify:

- Cirrhosis/Chronic hepatitis
- Jaundice (skin/eyes turn yellow)
- Hepatitis
  - A
  - B
  - C
  - D
  - Other (Specify): \_\_\_\_\_
- Heartburn
- Acid reflux (GERDS)
- Gall stones
- Ulcers
- Crohn's disease
- Irritable bowel syndrome
- Other (Specify): \_\_\_\_\_

**YES NO DK Muscle/Bone/Connective Tissue disorder**

If yes, please specify:

- Arthritis
  - Rheumatoid
  - Osteoarthritis
  - Other (specify): \_\_\_\_\_
- Osteoporosis
- Gout
- Temporomandibular joint disorder
- Lupus
- Scleroderma
- Fibromyalgia
- Other (Specify): \_\_\_\_\_

**YES NO DK Infectious disease**

If yes, please specify:

- HIV
- AIDS
- MRSA
- STD (sexually transmitted disease)
  - Syphilis
  - Gonorrhea
  - Chlamydia
  - Genital herpes
  - Human papillomavirus
- Cold sores
- Mononucleosis
- Other (Specify): \_\_\_\_\_

**YES NO DK Head/eye/ear/nose/throat problem**

If yes, please specify:

- Vision problems
- Wear contact lenses
- Glaucoma
- Cataract
- Hearing impairment
- Other (Specify): \_\_\_\_\_

**YES NO DK Dermatologic/Skin problem**  
**If yes, please specify:**  
 Psoriasis  
 Other (Specify): \_\_\_\_\_

**YES NO DK Eating disorder**  
**If yes, please specify:**  
 Bulimia  
 Anorexia  
 Other (Specify): \_\_\_\_\_

**YES NO DK Immunosuppression**

**YES NO DK Family history of diabetes**

**YES NO DK Family history of heart disease**

**YES NO DK Family history of cancer or tumors**

**YES NO DK Do you feel safe at home?**

**YES NO DK Do you have any other problem, disease, or condition not listed above?**  
**If yes, please specify:** \_\_\_\_\_

\_\_\_\_\_

**Dental History**

What is the reason for your dental visit today? **EXAMINATION EMERGENCY CONSULTATION PROCEDURE**

How would you describe your current dental problem? \_\_\_\_\_

Date of your last dental visit (Month/Year): \_\_\_\_/\_\_\_\_/\_\_\_\_

What was done at that time? **EXAMINATION EMERGENCY CONSULTATION PROCEDURE**

Date of your last dental exam (Month/Year): \_\_\_\_/\_\_\_\_/\_\_\_\_ Date of your last dental x-rays (Month/Year): \_\_\_\_/\_\_\_\_/\_\_\_\_

Date of your last dental cleaning (Month/Year): \_\_\_\_/\_\_\_\_/\_\_\_\_

**YES NO DK** Are you currently experiencing dental pain or discomfort?  
 If yes, specify where? **UPPER RIGHT UPPER LEFT LOWER RIGHT LOWER LEFT**

**YES NO DK** Are your teeth sensitive to cold, hot, sweets, or pressure? (Specify): **COLD HOT SWEETS PRESSURE**  
 If yes, specify where? **UPPER RIGHT UPPER LEFT LOWER RIGHT LOWER LEFT**

**YES NO DK** Do you have problems with eating (trouble chewing, vomiting, etc.)? (Specify): **TROUBLE CHEWING VOMITING OTHER**

**YES NO DK** Do you have swelling in or around your mouth, face, or neck? (Specify): **MOUTH FACE NECK**

**YES NO DK** Do you have loose teeth?

**YES NO DK** Do you have bad breath, metallic taste, or unpleasant taste?  
 (Specify): **BAD BREATH METALLIC TASTE UNPLEASANT TASTE**

**YES NO DK** Do you have headaches, earaches, or neck pains? (Specify): **HEADACHES EARACHES NECK PAINS**

**YES NO DK** Do you have any clicking, popping, discomfort, or limited opening in the jaw?  
 (Specify): **CLICKING POPPING DISCOMFORT LIMITED OPENING**

**YES NO DK** Do you clench, brux, or grind your teeth? (Specify): **CLENCH BRUX/GRIND BOTH**

**YES NO DK** Do you have sores or ulcers in your mouth?

**YES NO DK** Have you lost any teeth other than through extractions?

**YES NO DK** Do you have a history of tooth extraction or oral surgery (implants, cosmetic procedures, or TMJ surgery)?  
 (Specify): **EXTRACTIONS IMPLANTS FACIAL COSMETICS TMJ SURGERY**

**YES NO DK** Have you had any periodontal (gum) treatments?

**YES NO DK** Do you have bridges or wear dentures or partials? (Specify): **BRIDGES DENTURES PARTIALS**

**YES NO DK** Have you ever had root canal treatment?

**YES NO DK** Have you ever had orthodontic (braces) treatment?

**YES NO DK** Have you had a local anesthetic (Novocaine) for dental purposes?  
 If yes, have you experienced any problems? **YES NO** If yes, please specify: \_\_\_\_\_

**YES NO DK** Have you had any problems associated with previous dental treatment?  
 If yes, please specify: \_\_\_\_\_

How often do you brush your teeth?  
**NEVER SOMETIMES ONCE A DAY TWICE A DAY MORE THAN TWICE A DAY**

How often do you floss your teeth?  
**NEVER SOMETIMES ONCE A WEEK ONCE A DAY MORE THAN ONCE A DAY**

Do your gums bleed when you brush or floss?  
**NEVER SOMETIMES ALWAYS**

**YES NO DK** Do you have any obstacles to cleaning or caring for your teeth?

**YES NO DK** Does food or floss catch between your teeth?

**YES NO DK** Do you participate in active recreational activities or sports?

**YES NO DK** Have you ever had a serious injury to your head or mouth?

**YES NO DK** Are you unhappy with your smile or the appearance of your teeth?

**YES NO DK** Are you worried about losing your teeth?

**Rate your fear of dental treatment on a scale of 0 (no fear) to 10 (extreme fear):** \_\_\_\_\_

**Please state any questions or concerns about dentistry or your dental health:** \_\_\_\_\_

Did an interpreter help you with these forms? **YES NO**

If you are completing these forms for the patient, what is your relationship to the patient? **MOTHER FATHER GUARDIAN OTHER**

If you are completing these forms for the patient, what is your name? \_\_\_\_\_
